# Supplementary material for: Understanding the thermal motion of the luminescent dyes in the dye–surfactant cointercalated ZnAl-layered double hydroxides: a molecular dynamics study
Source: Royal Society of Chemistry journal article supplement (doi:10.1039/c4ra08299k), 2014-09-19
Supplement: c4ra08299k1.pdf [file c4ra08299k1.pdf]

*Electronic Supplementary Information (ESI) for*  
**Understanding the Thermal Motion of the Luminescent Dyes in  
the Dye-Surfactant Cointercalated ZnAl-Layered Double  
Hydroxides: a Molecular Dynamic Study**

**Si-Min Xu, Shi-Tong Zhang, Wen-Ying Shi, Fan-Yu Ning, Yi Fu, Hong Yan\***

*State Key Laboratory of Chemical Resource Engineering,  
Beijing University of Chemical Technology, Beijing 100029, P. R. China.  
Tel: +86-10-64412131; Fax: +86-10-64425385;  
E-mail: yanhong@mail.buct.edu.cn*

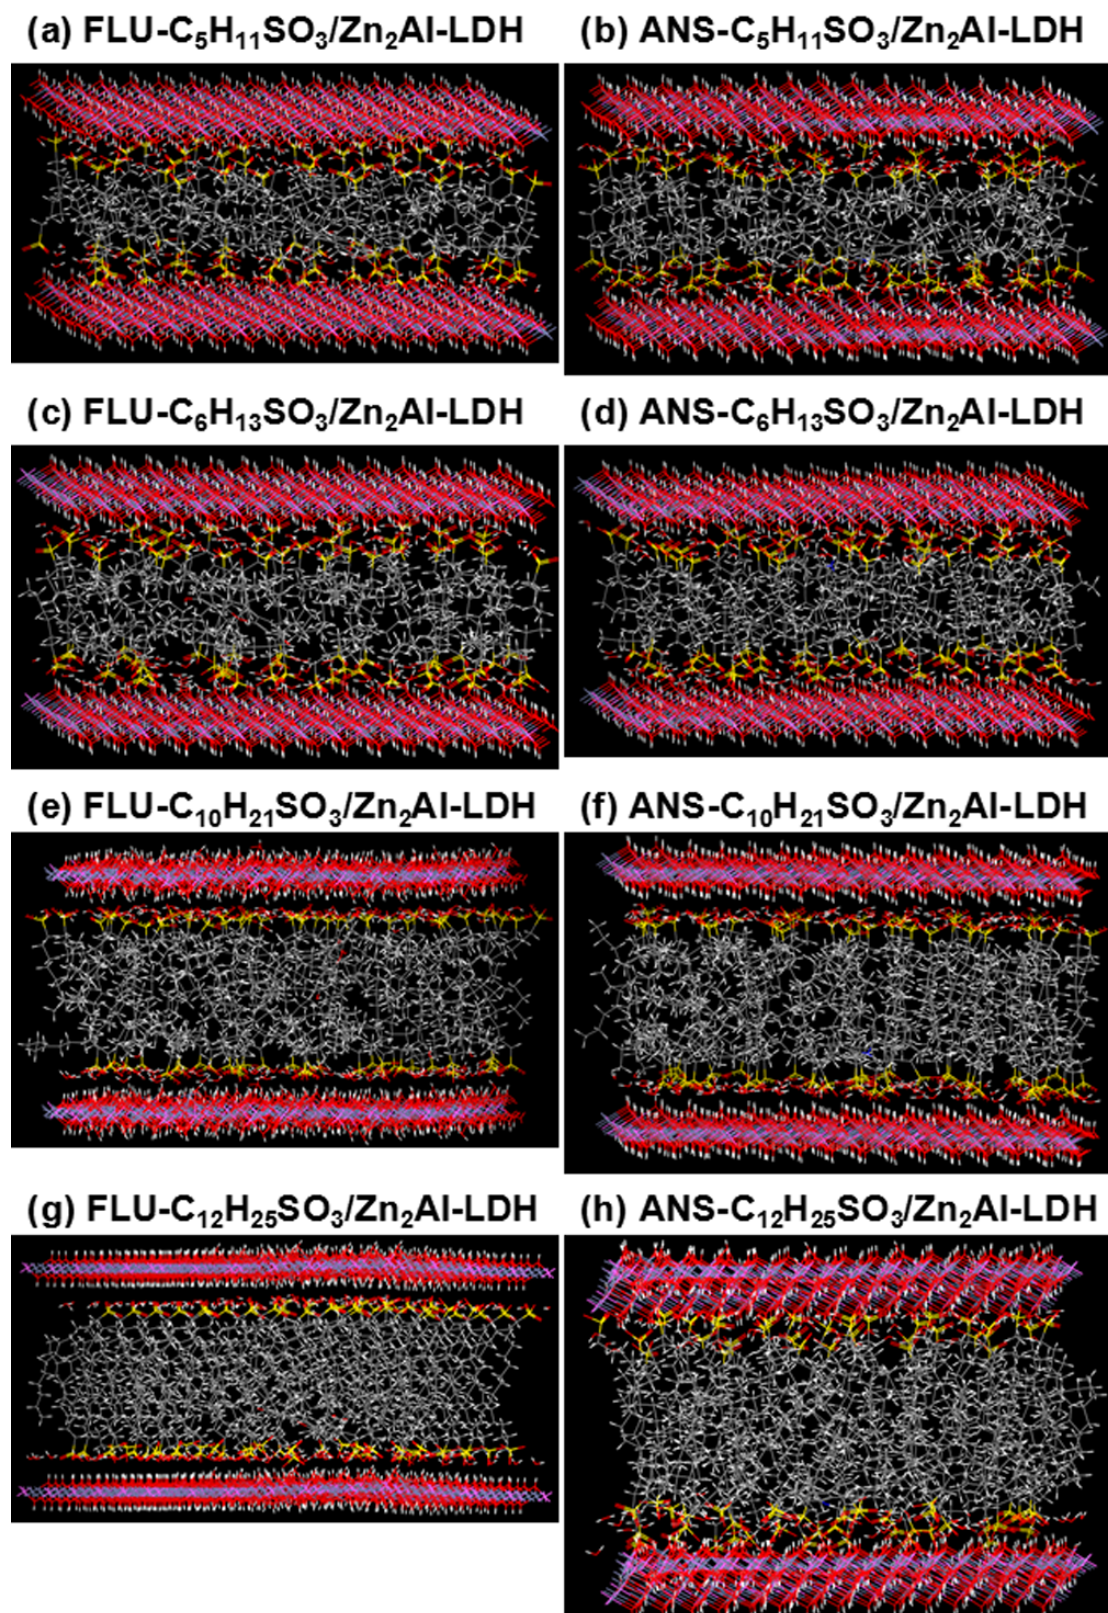

Fig. S1 The snapshots of dye-C<sub>n</sub>H<sub>2n+1</sub>SO<sub>3</sub>/Zn<sub>2</sub>Al-LDH ( $n = 5, 6, 10$  or  $12$ , respectively) after molecular dynamics simulations of 10 ns.



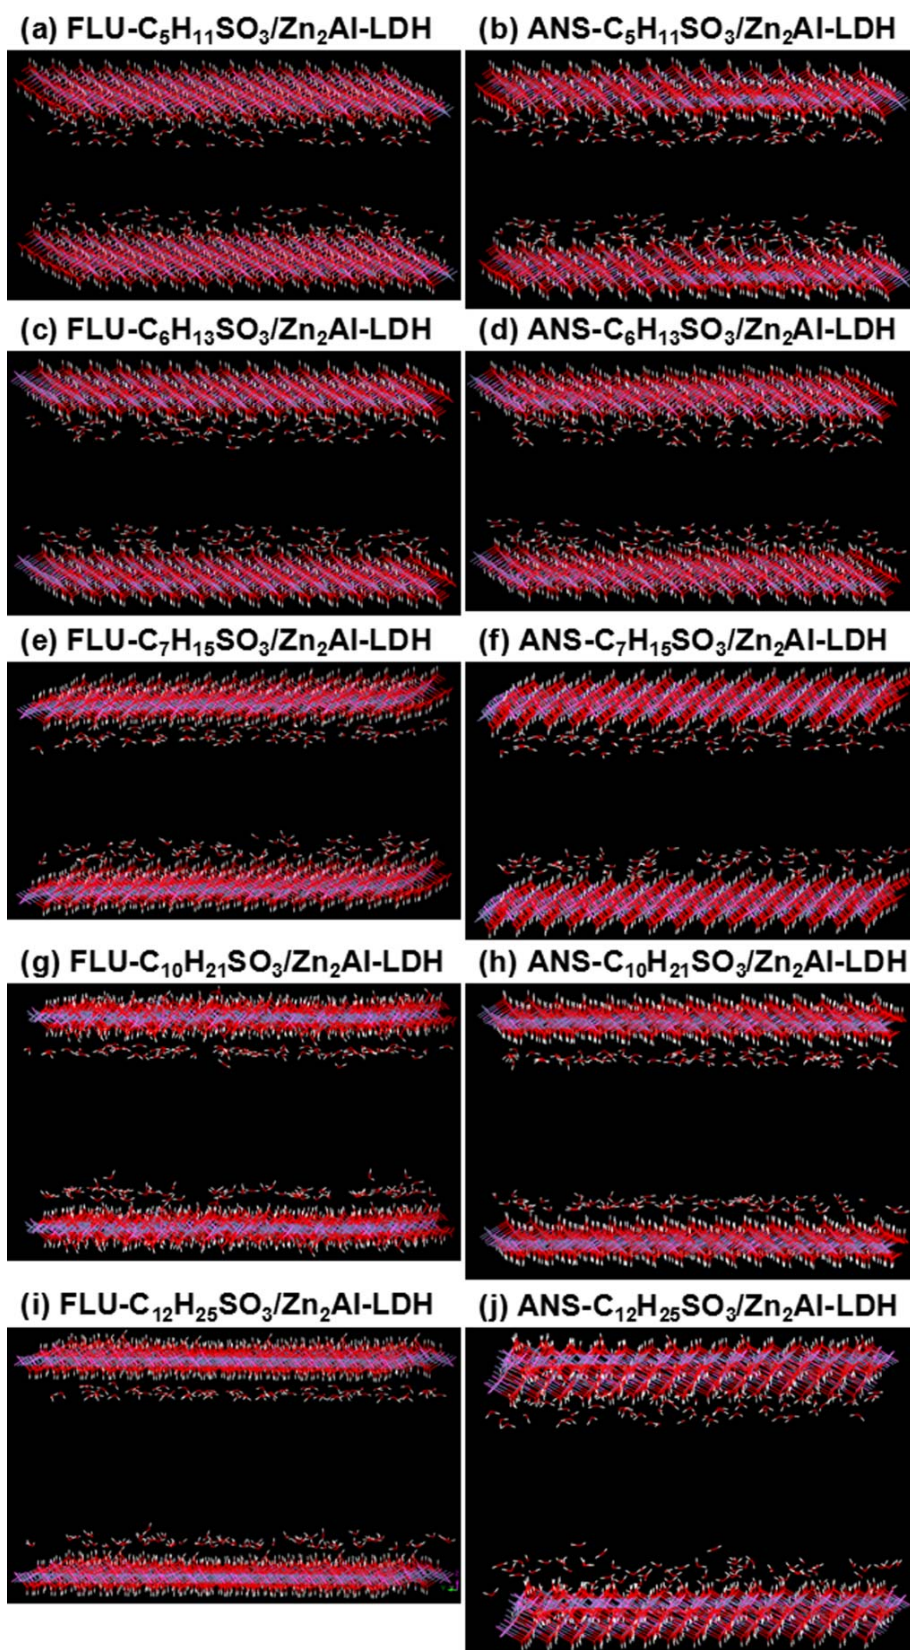

Fig. S2 The snapshots of dye-C<sub>n</sub>H<sub>2n+1</sub>SO<sub>3</sub>/Zn<sub>2</sub>Al-LDH ( $n = 5, 6, 7, 10$  or  $12$ , respectively) after molecular dynamics simulations of 10 ns with dye and C<sub>n</sub>H<sub>2n+1</sub>SO<sub>3</sub> omitted.

Table S1 Detailed  $E_{\text{model}}$ ,  $E_{\text{dye}}$  and  $E_{\text{model without dye}}$  of LDHs-based models.

| Model                                                                       | $E_{\text{model}} / \text{kcal}\cdot\text{mol}^{-1}$ | $E_{\text{dye}} / \text{kcal}\cdot\text{mol}^{-1}$ | $E_{\text{model without dye}} / \text{kcal}\cdot\text{mol}^{-1}$ |
|-----------------------------------------------------------------------------|------------------------------------------------------|----------------------------------------------------|------------------------------------------------------------------|
| FLU-C <sub>5</sub> H <sub>11</sub> SO <sub>3</sub> /Zn <sub>2</sub> Al-LDH  | -257509.90                                           | 26.32                                              | -257399.28                                                       |
| FLU-C <sub>6</sub> H <sub>13</sub> SO <sub>3</sub> /Zn <sub>2</sub> Al-LDH  | -256069.82                                           | 26.32                                              | -255955.01                                                       |
| FLU-C <sub>7</sub> H <sub>15</sub> SO <sub>3</sub> /Zn <sub>2</sub> Al-LDH  | -257636.24                                           | 26.32                                              | -257359.25                                                       |
| FLU-C <sub>10</sub> H <sub>21</sub> SO <sub>3</sub> /Zn <sub>2</sub> Al-LDH | -264251.29                                           | 26.32                                              | -264077.06                                                       |
| FLU-C <sub>12</sub> H <sub>25</sub> SO <sub>3</sub> /Zn <sub>2</sub> Al-LDH | -256821.47                                           | 26.32                                              | -256724.28                                                       |
| ANS-C <sub>5</sub> H <sub>11</sub> SO <sub>3</sub> /Zn <sub>2</sub> Al-LDH  | -254474.43                                           | 119.99                                             | -254435.67                                                       |
| ANS-C <sub>6</sub> H <sub>13</sub> SO <sub>3</sub> /Zn <sub>2</sub> Al-LDH  | -254587.85                                           | 119.99                                             | -254536.04                                                       |
| ANS-C <sub>7</sub> H <sub>15</sub> SO <sub>3</sub> /Zn <sub>2</sub> Al-LDH  | -257565.24                                           | 119.99                                             | -257497.07                                                       |
| ANS-C <sub>10</sub> H <sub>21</sub> SO <sub>3</sub> /Zn <sub>2</sub> Al-LDH | -254695.84                                           | 119.99                                             | -254682.38                                                       |
| ANS-C <sub>12</sub> H <sub>25</sub> SO <sub>3</sub> /Zn <sub>2</sub> Al-LDH | -256635.89                                           | 119.99                                             | -256651.16                                                       |
| FLU-HPS/Zn <sub>0.827</sub> Al <sub>0.173</sub> -LDH                        | -266855.26                                           | 26.32                                              | -266747.23                                                       |
| FLU-HPS/Zn <sub>0.787</sub> Al <sub>0.213</sub> -LDH                        | -263953.36                                           | 26.32                                              | -263760.55                                                       |
| FLU-HPS/Zn <sub>0.747</sub> Al <sub>0.253</sub> -LDH                        | -263549.68                                           | 26.32                                              | -263318.06                                                       |
| FLU-HPS/Zn <sub>0.707</sub> Al <sub>0.293</sub> -LDH                        | -257530.51                                           | 26.32                                              | -257291.90                                                       |
| ANS-HPS/Zn <sub>0.827</sub> Al <sub>0.173</sub> -LDH                        | -269322.64                                           | 119.99                                             | -269406.20                                                       |
| ANS-HPS/Zn <sub>0.787</sub> Al <sub>0.213</sub> -LDH                        | -266425.78                                           | 119.99                                             | -266466.42                                                       |
| ANS-HPS/Zn <sub>0.747</sub> Al <sub>0.253</sub> -LDH                        | -263524.30                                           | 119.99                                             | -263512.08                                                       |
| ANS-HPS/Zn <sub>0.707</sub> Al <sub>0.293</sub> -LDH                        | -260411.97                                           | 119.99                                             | -260358.01                                                       |

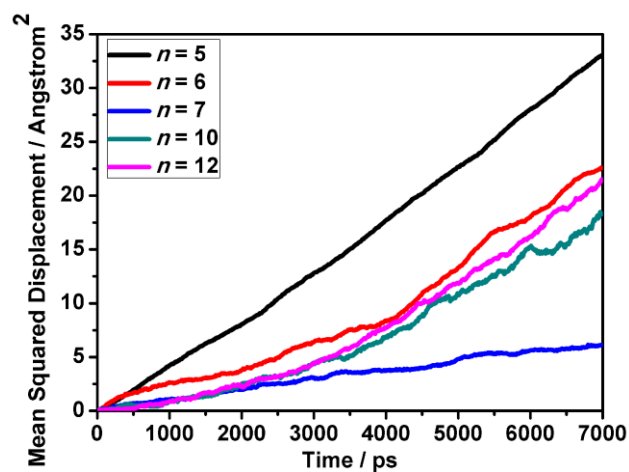

Fig. S3 The plots of mean squared displacement as the function of time for FLU- $C_nH_{2n+1}SO_3/Zn_2Al$ -LDHs.

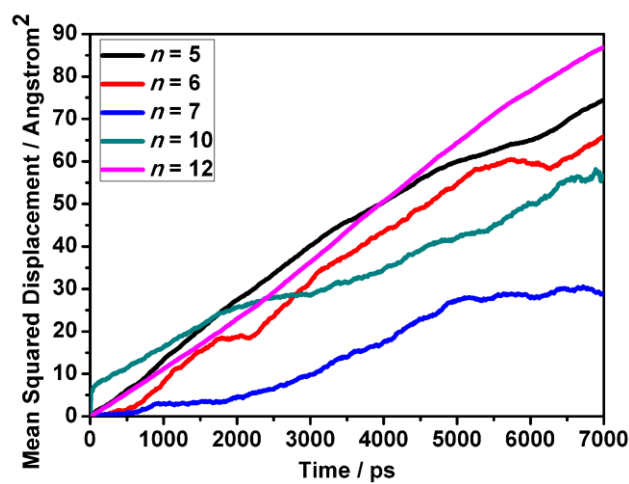

Fig. S4 The plots of mean squared displacement as the function of time for ANS- $C_nH_{2n+1}SO_3/Zn_2Al$ -LDHs.



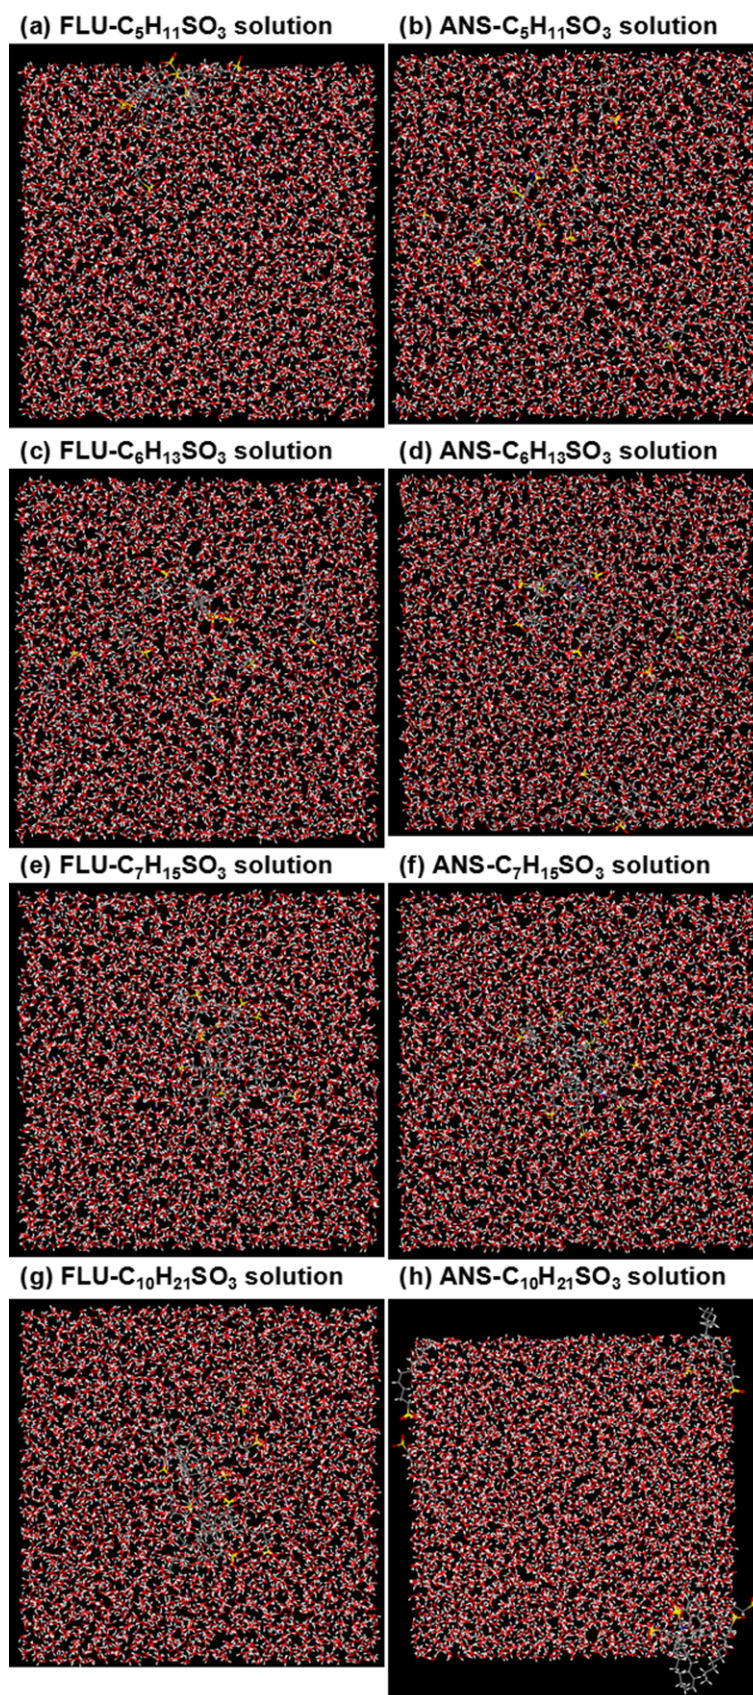

Fig. S5 The snapshots of dye-C<sub>n</sub>H<sub>2n+1</sub>SO<sub>3</sub> solution ( $n = 5, 6, 7$  and  $10$ , respectively) after molecular dynamics simulations of 10 ns.

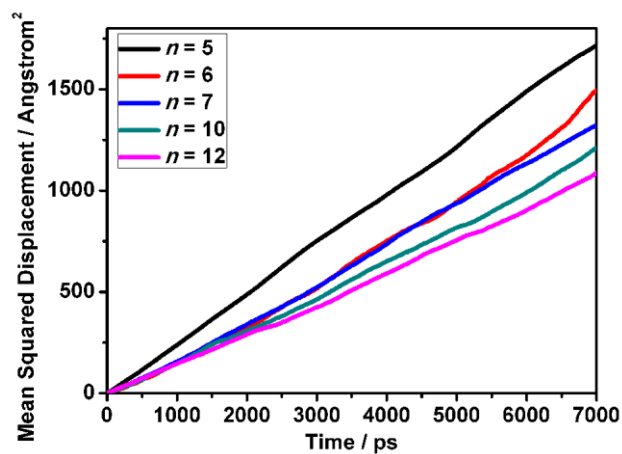

Fig. S6 The plots of mean squared displacement as the function of time for FLU- $C_nH_{2n+1}SO_3$  solutions ( $n = 5, 6, 7, 10$  and  $12$ , respectively).

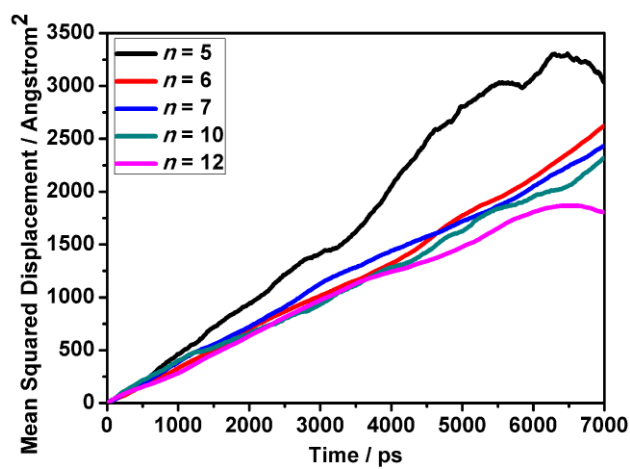

Fig. S7 The plots of mean squared displacement as the function of time for ANS- $C_nH_{2n+1}SO_3$  solutions ( $n = 5, 6, 7, 10$  and  $12$ , respectively).



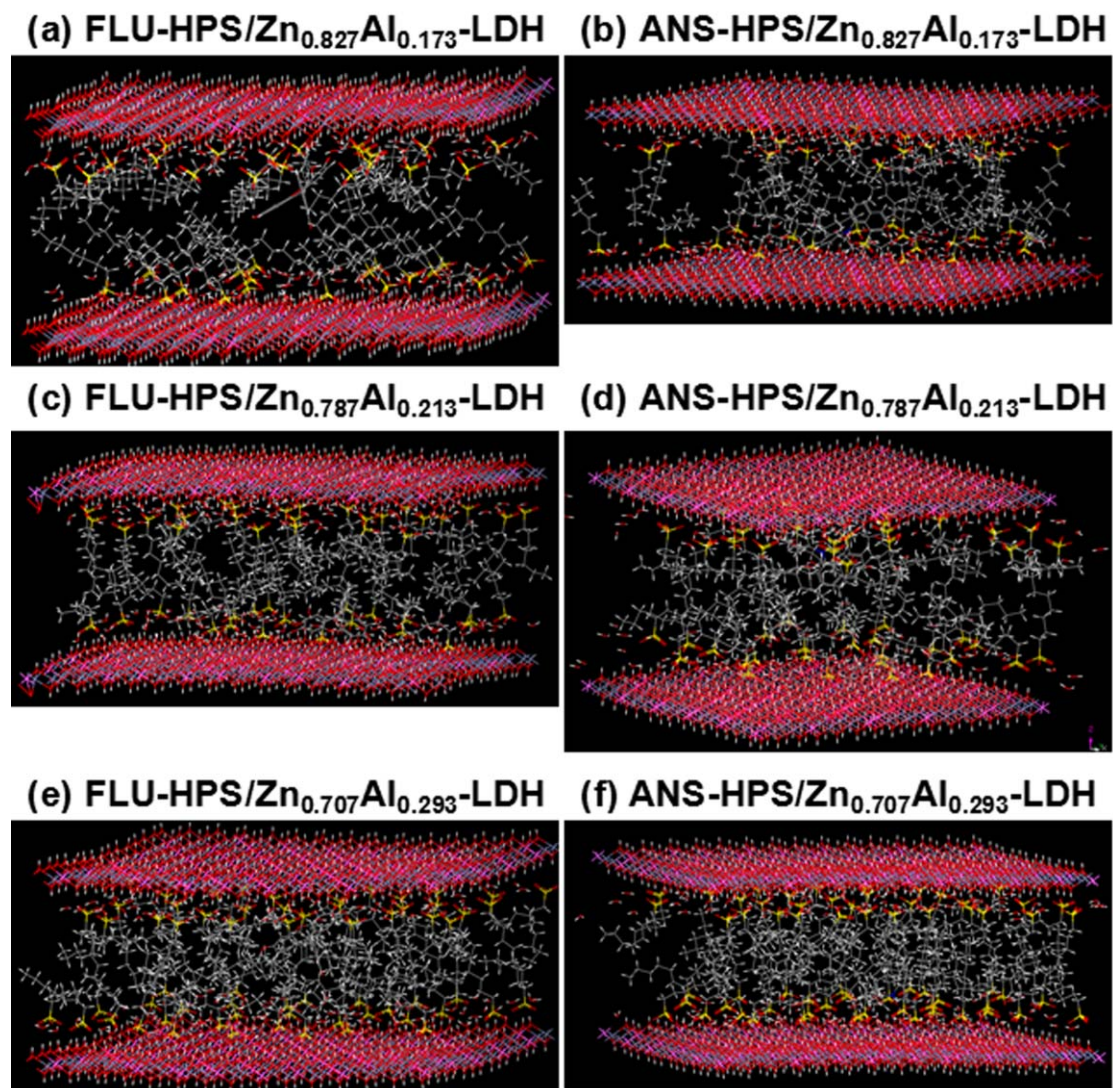

Fig. S8 The snapshots of dye-HPS/Zn<sub>1-x</sub>Al<sub>x</sub>-LDHs ( $x = 0.173, 0.213$  and  $0.293$ , respectively) after molecular dynamics simulations of 10 ns.



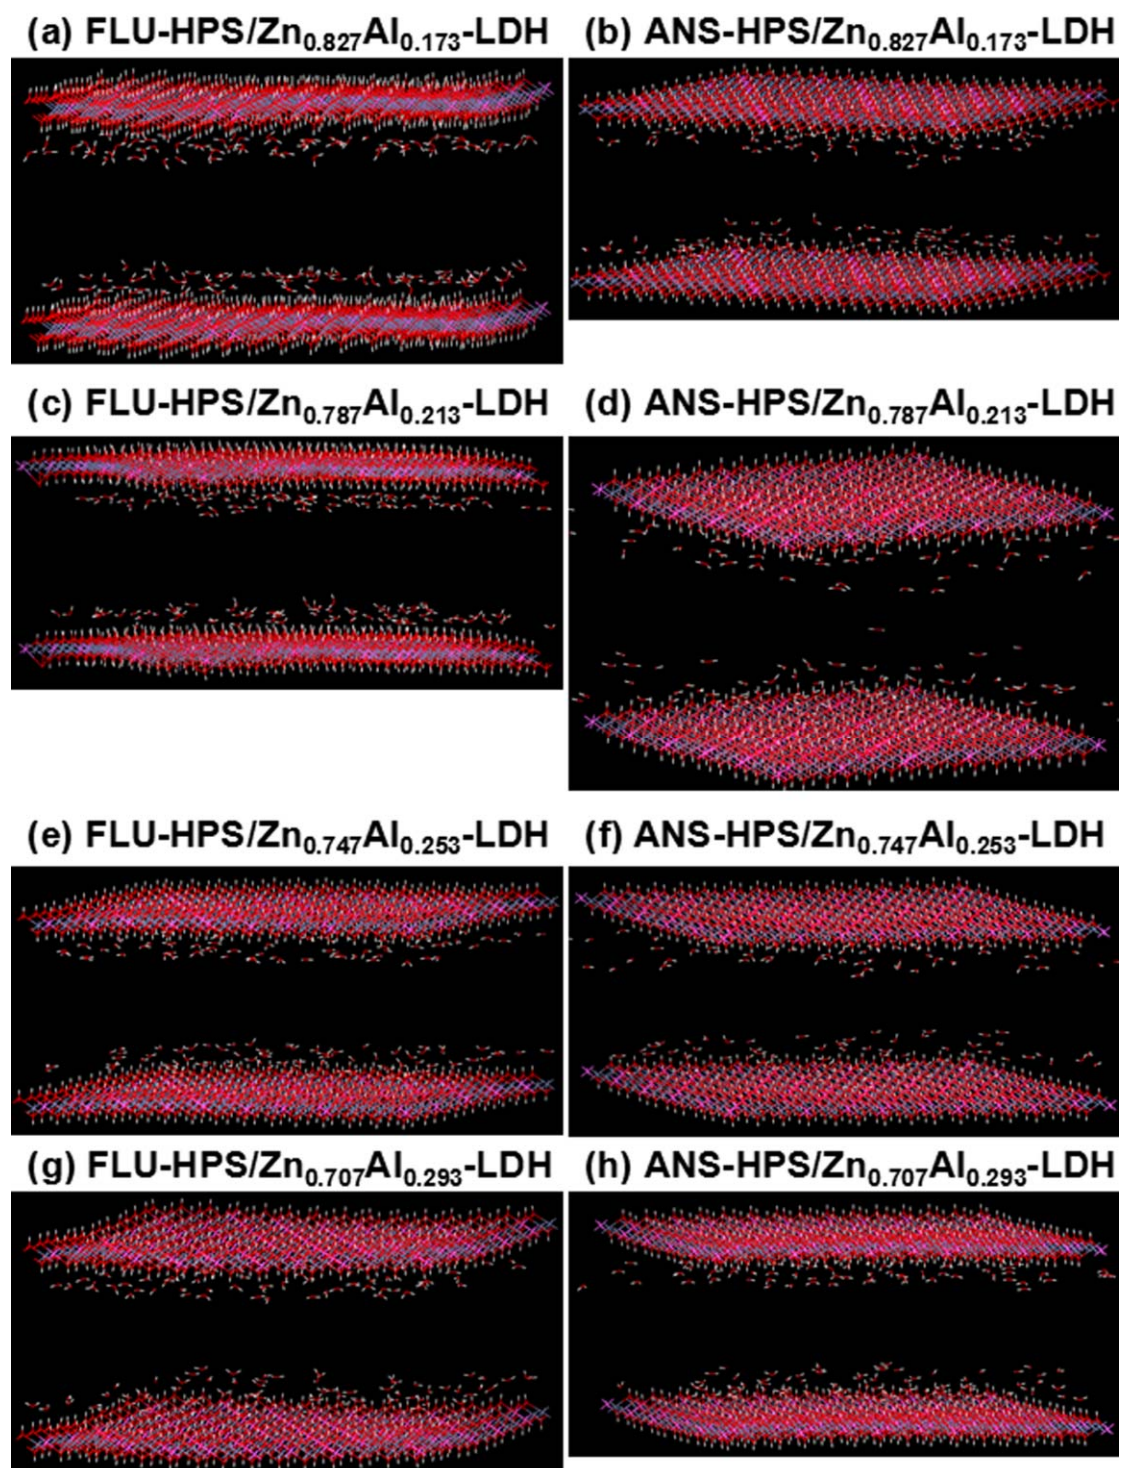

Fig. S9 The snapshots of dye-HPS/Zn<sub>1-x</sub>Al<sub>x</sub>-LDHs ( $x = 0.173, 0.213, 0.253$  and  $0.293$ , respectively) after molecular dynamics simulations of 10 ns with dye and HPS omitted.

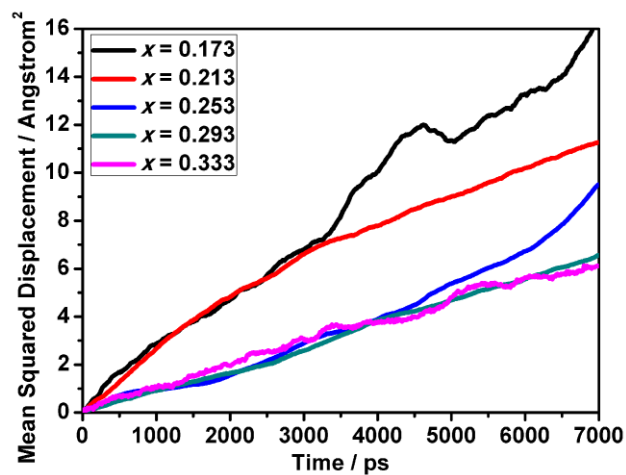

Fig. S10 The plots of mean squared displacement as the function of time for FLU-HPS/ $Zn_{1-x}Al_x$ -LDHs.

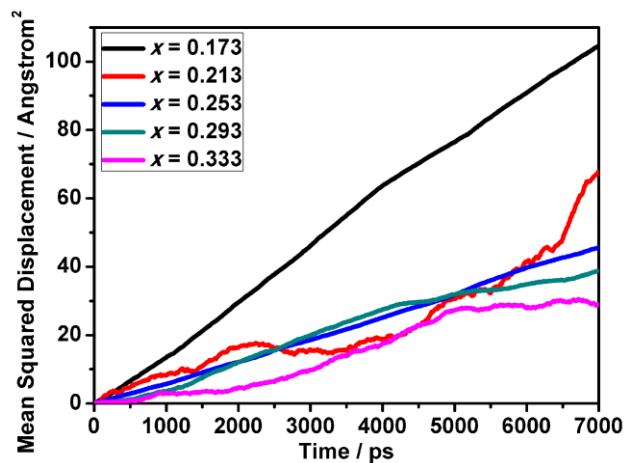

Fig. S11 The plots of mean squared displacement as the function of time for ANS-HPS/ $Zn_{1-x}Al_x$ -LDHs.
